# Supplementary material for: Genomic Sequence around Butterfly Wing Development Genes: Annotation and Comparative Analysis
Source: PubMed Central journal article supplement (PMC3166123; doi:10.1371/journal.pone.0023778), 2011-08-31
Supplement: pone.0023778.s001.pdf [file pone.0023778.s001.pdf]

**Table S1. Quantification of repetitive sequence in target *B. anynana* BACs**

| BAC ID<br>(GenBank) | All repeats    |      |        | Simple Repeats |      |        | Low Complexity Sequence |      |                                   |
|---------------------|----------------|------|--------|----------------|------|--------|-------------------------|------|-----------------------------------|
|                     | Length<br>(bp) | %    | Number | Length<br>(bp) | %    | Number | Length<br>(bp)          | %    | Number<br>[rich in AT/GC/A/G/C/T] |
| AC239114            | 3189           | 2.94 | 76     | 655            | 0.60 | 14     | 2534                    | 2.33 | 62 [59/0/0/2/1/0]                 |
| AC239115            | 3525           | 2.79 | 88     | 283            | 0.22 | 8      | 3242                    | 2.56 | 80 [77/2/0/0/1/0]                 |
| AC239116            | 3928           | 3.60 | 78     | 627            | 0.57 | 15     | 2992                    | 2.74 | 63 [57/0/4/1/1/0]                 |
| AC239117            | 2125           | 2.16 | 57     | 247            | 0.25 | 8      | 1878                    | 1.91 | 49 [49/0/0/0/0/0]                 |
| AC239118            | 3499           | 2.39 | 85     | 864            | 0.59 | 16     | 2635                    | 1.80 | 69 [65/1/0/0/1/2]                 |
| AC239119            | 4275           | 3.48 | 105    | 790            | 0.64 | 16     | 3485                    | 2.84 | 89 [85/0/2/1/0/1]                 |
| AC239120            | 2324           | 2.38 | 53     | 411            | 0.42 | 8      | 1913                    | 1.96 | 45 [42/1/1/0/1/0]                 |
| AC239121            | 3220           | 2.79 | 75     | 1012           | 0.88 | 19     | 2208                    | 1.92 | 56 [52/2/0/1/1/0]                 |
| AC239122            | 2949           | 2.31 | 78     | 512            | 0.40 | 11     | 2437                    | 1.91 | 67 [64/0/1/0/1/1]                 |
| AC239123            | 3445           | 2.67 | 81     | 640            | 0.50 | 10     | 2805                    | 2.17 | 71 [69/1/0/0/1/0]                 |
| AC239124            | 3088           | 2.54 | 81     | 373            | 0.31 | 11     | 2715                    | 2.23 | 70 [67/0/1/2/0/0]                 |

Identification and characterization of repeated regions was done with RepeatMasker (see Methods). Simple Repeats correspond to duplications of, typically 1-5bases. Low Complexity Sequence corresponds to poly-purine/poly-pyrimidine stretches or regions of >87% AT or >89% GC.
