# Supplementary material for: Genomic Sequence around Butterfly Wing Development Genes: Annotation and Comparative Analysis
Source: PubMed Central journal article supplement (PMC3166123; doi:10.1371/journal.pone.0023778), 2011-08-31
Supplement: pone.0023778.s002.pdf [file pone.0023778.s002.pdf]

**Table S2. *Heliconius* repetitive elements identified in the target *B. anynana* BACs**

| BAC      | element 2     |         |                                                                                        |                         | element 9   |         |                                                                                    |                         |
|----------|---------------|---------|----------------------------------------------------------------------------------------|-------------------------|-------------|---------|------------------------------------------------------------------------------------|-------------------------|
|          | position      | e-value | other leps                                                                             | e-value                 | position    | e-value | other leps                                                                         | e-value                 |
| AC239122 | 29967-29997   | 2e-06   | <i>Papilio dardanus</i><br><i>Helicoverpa armigera</i><br><i>Spodoptera littoralis</i> | 1e-14<br>2e-13<br>6e-12 | -           | -       | <i>Ostrinia nubilalis</i><br><i>Melitaea cinxia</i><br><i>Helicoverpa armigera</i> | 5e-26<br>1e-09<br>3e-09 |
| AC239115 | 56023-56068   | 2e-07   |                                                                                        |                         | -           | -       |                                                                                    |                         |
|          | 107905-107940 | 2e-07   |                                                                                        |                         | -           | -       |                                                                                    |                         |
| AC239118 | 76369-76405   | 1e-09   |                                                                                        |                         | 84559-84632 | 1e-06   |                                                                                    |                         |
| AC239120 | 18420-18453   | 2e-06   |                                                                                        |                         | -           | -       |                                                                                    |                         |
|          | 18263-18312   | 7e-06   |                                                                                        |                         | -           | -       |                                                                                    |                         |
| AC239119 | 65696-65768   | 2e-11   |                                                                                        |                         | 82849-82973 | 2e-06   |                                                                                    |                         |
|          | 30261-30297   | 5e-07   |                                                                                        |                         | -           | -       |                                                                                    |                         |
| AC239124 | 64714-64746   | 3e-10   |                                                                                        |                         | -           | -       |                                                                                    |                         |
|          | 64827-64874   | 4e-08   |                                                                                        |                         | -           | -       |                                                                                    |                         |
| AC239114 | 3091-3126     | 2e-06   |                                                                                        |                         | -           | -       |                                                                                    |                         |
| AC239121 | 38725-38797   | 5e-14   |                                                                                        |                         | 77007-77131 | 7e-06   |                                                                                    |                         |

Two of the novel repetitive elements identified in *Heliconius* [10] appear to be present in our target *B. anynana* genomic sequence, as well as in publicly available nucleotide sequence for other lepidopterans (cf. BLASTn analysis; see Methods).
