# Supplementary material for: Genomic Sequence around Butterfly Wing Development Genes: Annotation and Comparative Analysis
Source: PubMed Central journal article supplement (PMC3166123; doi:10.1371/journal.pone.0023778), 2011-08-31

**Figure S4. Gene density and genome size in insects.** Gene density (number of genes per 100 Kb; *cf.* [10,46,82,83,84,85,86,87,88]) in relation to genome size for different insect species (*cf.* [89]). Circles correspond to species where gene densities were estimated based on sequenced genomes – note that the size of assembled genome can differ from the estimates in this Figure. Other symbols correspond to species where gene density was estimated based on a few BAC clone sequences – including this paper for *B. anynana*.

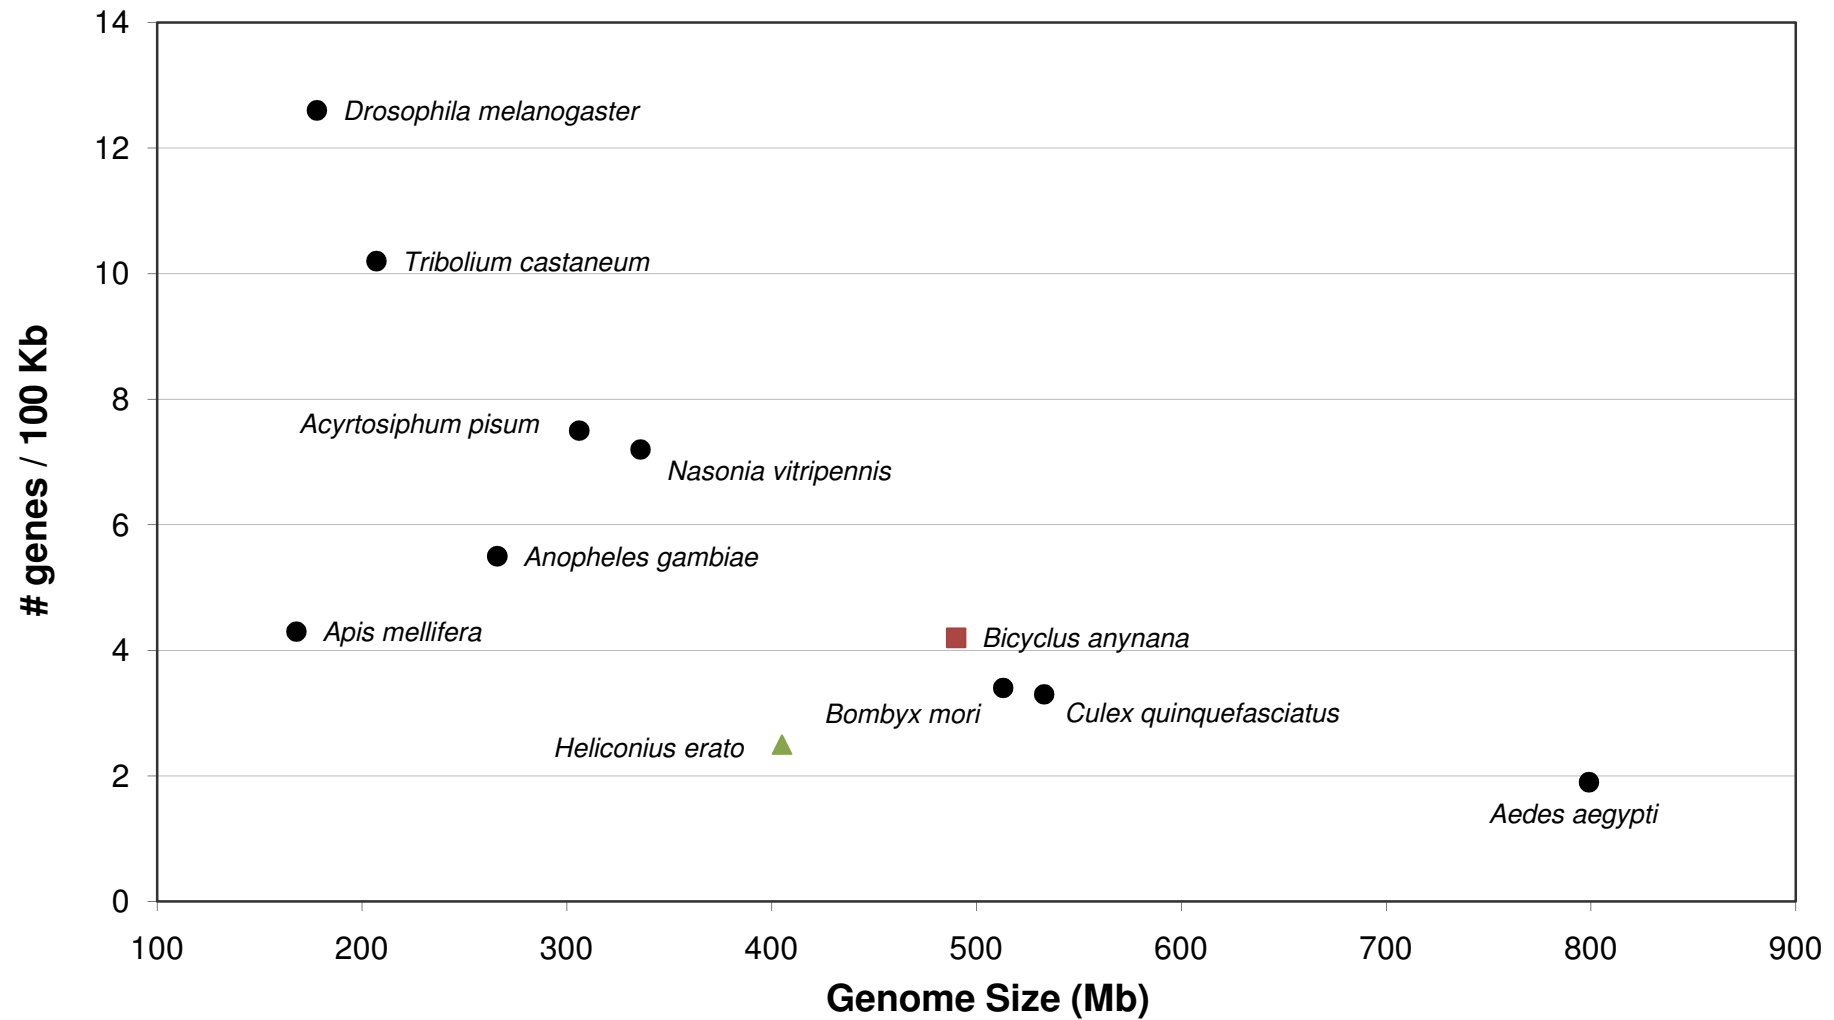

Supplement: pone.0023778.s004.pdf [file pone.0023778.s004.pdf]
