# Supplementary material for: Genomic Sequence around Butterfly Wing Development Genes: Annotation and Comparative Analysis
Source: PubMed Central journal article supplement (PMC3166123; doi:10.1371/journal.pone.0023778), 2011-08-31

**Figure S5. Comparative analysis of the *EcR* and *wg/Wnt-6* genomic regions.** VISTA plots of the genomic regions comprising the genes *EcR* (BAC AC239120) and *wg/Wnt-6* (BAC AC239123) with the orthologous regions in other insects with relevant sequence available: *Bombyx mori*, *Drosophila melanogaster*, *Apis mellifera*, *Tribolium castaneum*, *Helicoverpa armigera*, *Spodoptera frugiperda*, and *Heliconius melpomene*.

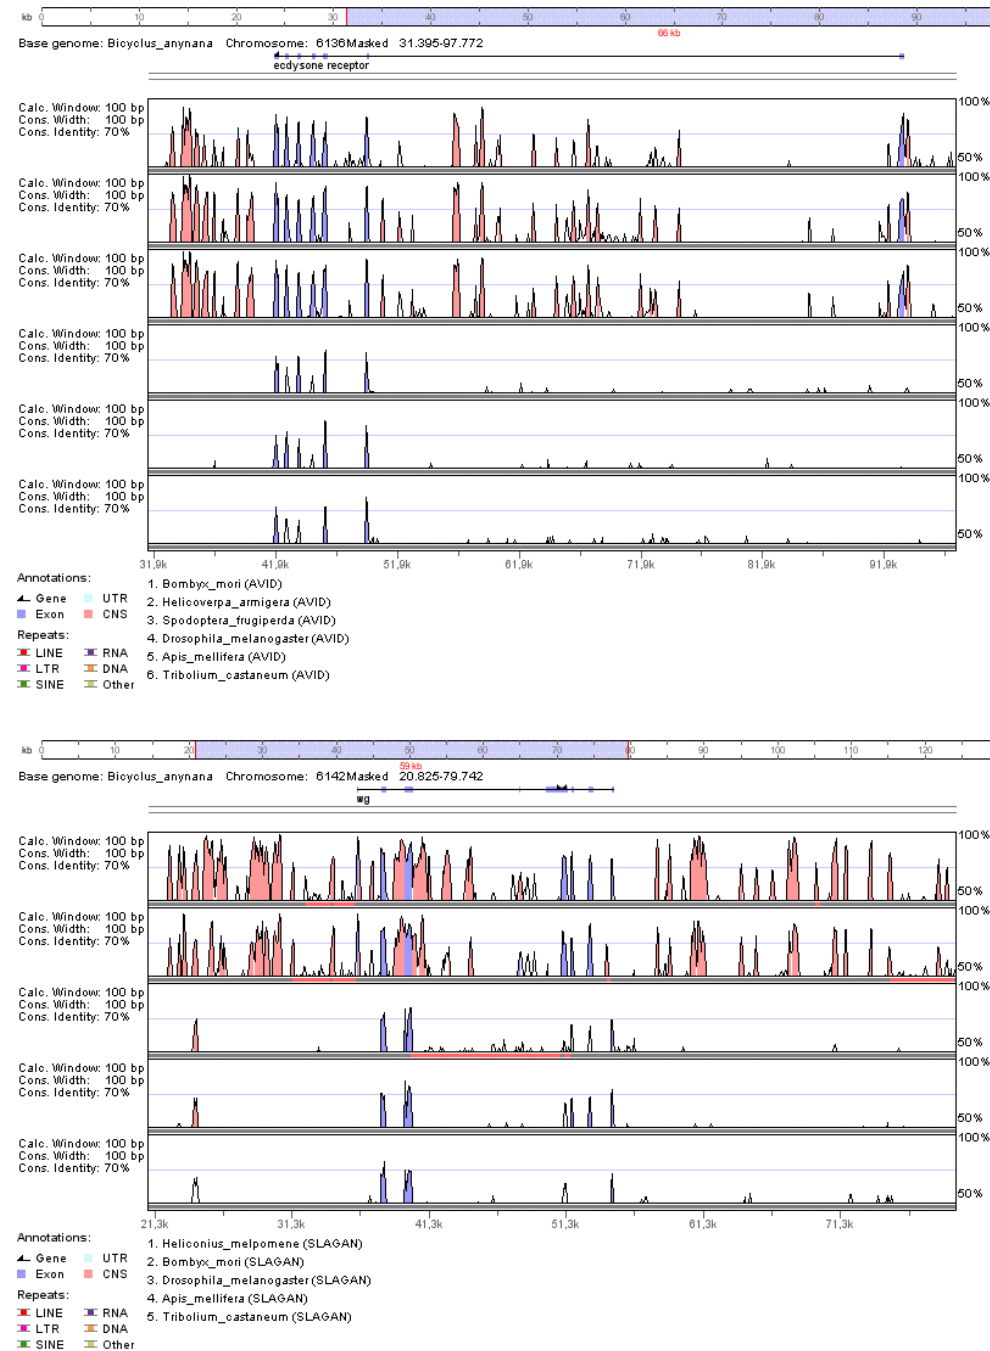

Supplement: pone.0023778.s005.pdf [file pone.0023778.s005.pdf]
